# Supplementary material for: Kinesiophobie bei Schulterbeschwerden
Source: Springer Nature journal article supplement (doi:10.1007/s00482-022-00678-2), 2022-12-02
Supplement: MOESM1 [file 23782996]

## Tampa Scale for Kinesiophobia (TSK-GV)

Mit den nachfolgenden Fragen möchten wir untersuchen, wie Sie selbst zu Ihren Schmerzen stehen. Bitte geben Sie an, in welchem Maße Sie mit den vorgegebenen Aussagen einverstanden sind.

A = überhaupt nicht einverstanden

B = mehr oder weniger nicht einverstanden

C = mehr oder weniger einverstanden

D = völlig einverstanden

| Aussage                                                                                                                                              | A | B | C | D |
|------------------------------------------------------------------------------------------------------------------------------------------------------|---|---|---|---|
| 1. Ich habe Angst davor, dass ich mich möglicherweise verletze, wenn ich Sport treibe.                                                               |   |   |   |   |
| 2. Wenn ich versuchen würde, mich über die Schmerzen hinweg zu setzen, würde sie noch schlimmer.                                                     |   |   |   |   |
| 3. Mein Körper sagt mir, dass ich etwas sehr Schlimmes habe.                                                                                         |   |   |   |   |
| 4. Mein Gesundheitszustand wird von anderen nicht ernst genug genommen.                                                                              |   |   |   |   |
| 5. Wegen des Schmerzproblems ist mein Körper für den Rest meines Lebens gefährdet.                                                                   |   |   |   |   |
| 6. Schmerz bedeutet immer, dass ich mich verletzt habe.                                                                                              |   |   |   |   |
| 7. Die sicherste Art, zu verhindern, dass meine Schmerzen schlimmer werden, ist einfach darauf zu achten, dass ich keine unnötigen Bewegungen mache. |   |   |   |   |
| 8. Ich hätte nicht so viele Schmerzen, wenn nicht etwas Bedenkliches in meinem Körper vor sich hinge.                                                |   |   |   |   |
| 9. Meine Schmerzen sagen mir, wann ich mit dem Training aufhören muss, um mich nicht zu verletzen.                                                   |   |   |   |   |
| 10. Ich kann nicht all die Dinge tun, die gesunde Menschen machen, da ich mich zu leicht verletzen könnte.                                           |   |   |   |   |
| 11. Niemand sollte Sport treiben müssen, wenn er/sie Schmerzen hat.                                                                                  |   |   |   |   |
